# Supplementary material for: Neurodegenerative disease risk among former international rugby union players
Source: PubMed Central journal article supplement — J Neurol Neurosurg Psychiatry. 2022 Oct 4;93(12):1262–8. doi: 10.1136/jnnp-2022-329675 (PMC9669247; doi:10.1136/jnnp-2022-329675), 2022-10-04

**Neurodegenerative disease risk among former international rugby union players  
Supplementary figures and tables**

**Supplementary Table 1: ICD-9 and ICD-10 codes for outcomes assessed.**

|                                                                | <b>ICD-9</b>                                                            | <b>ICD-10</b>                                                                 |
|----------------------------------------------------------------|-------------------------------------------------------------------------|-------------------------------------------------------------------------------|
| <b>Neurodegenerative disease</b>                               | 290.0 to .4;<br>294.1 & .2;<br>331.0 to .2 & .6 to .9;<br>332;<br>335.2 | F01 to F03;<br>G12.2;<br>G20;<br>G21;<br>G23.1 to .3, .8 & .9;<br>G30;<br>G31 |
| <b>Dementia, not otherwise specified</b>                       | 290.0 to .4;<br>294.1 & .2;<br>331.0 to .2 & .6 to .9;                  | F01 to F03;<br>G23.1 to .3;<br>G30;<br>G31                                    |
| <b>Motor neuron disease/<br/>Amyotrophic lateral sclerosis</b> | 335.2                                                                   | G12.2                                                                         |
| <b>Parkinson's disease</b>                                     | 332                                                                     | G20;<br>G21;<br>G23.8 & .9                                                    |
| <b>Cardiovascular disease</b>                                  | 390 to 459                                                              | I00 to I99                                                                    |
| <b>Respiratory disease</b>                                     | 460 to 519                                                              | J00 to J99                                                                    |
| <b>Cancer</b>                                                  | 140 to 239                                                              | C00 to D49                                                                    |

**Supplementary Table 2: British National Formulary (BNF) subsections and drugs assessed in the analysis of neurodegenerative disease related prescriptions.**

| <b>BNF section</b> | <b>Drugs</b>                                                                                                                                                                                                                                                                                                      |
|--------------------|-------------------------------------------------------------------------------------------------------------------------------------------------------------------------------------------------------------------------------------------------------------------------------------------------------------------|
| <b>4.9.1</b>       | Apomorphine hydrochloride<br>Apomorphine hydrochloride hemihydrate<br>Carbidopa<br>Co-beneldopa (Benserazide/levodopa)<br>Co-careldopa (Carbidopa/levodopa)<br>Entacapone<br>Levodopa<br>Levodopa/carbidopa/entacapone<br>Opicapone<br>Rasagiline mesylate<br>Safinamide<br>Selegiline hydrochloride<br>Tolcapone |
| <b>4.9.2</b>       | Orphenadrine hydrochloride<br>Trihexyphenidyl hydrochloride                                                                                                                                                                                                                                                       |
| <b>4.9.3</b>       | Riluzole                                                                                                                                                                                                                                                                                                          |
| <b>4.11</b>        | Donepezil hydrochloride<br>Galantamine<br>Idebenone<br>Memantine hydrochloride<br>Rivastigmine                                                                                                                                                                                                                    |

**Supplementary Figure 1: Flow diagram of the creation of the final former international rugby player and matched general population comparison group.**

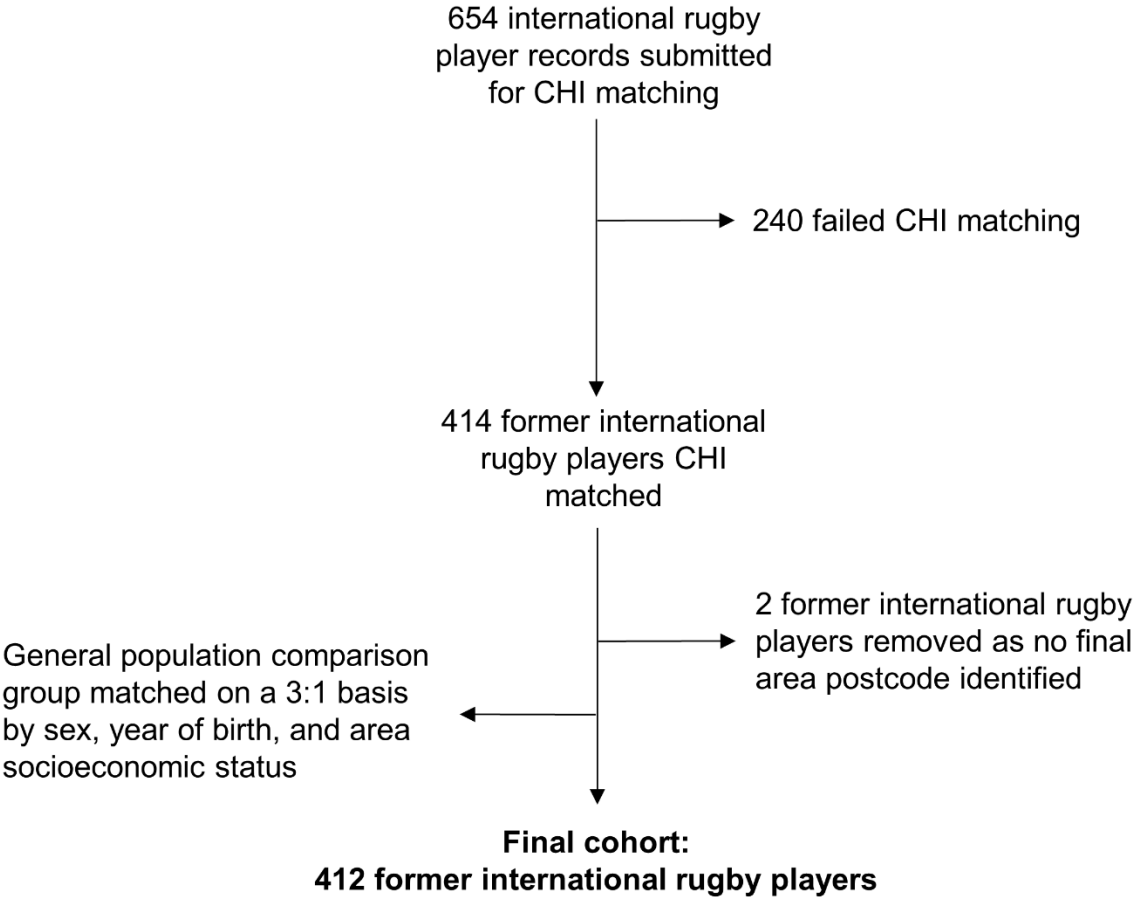

Supplement: NIHMS1841299-supplement-Supplementary.pdf [file NIHMS1841299-supplement-Supplementary.pdf]
